# Supplementary material
Source: Research Square preprint supplement (doi:10.21203/rs.3.rs-8967090/v1)
Supplement: Supplementary file 1 [file 54a193275bfb77cf11972125.pdf]

## 科研项目医学伦理审查意见表

伦理编号: 2024ky016

|        |                                                                                                                |
|--------|----------------------------------------------------------------------------------------------------------------|
| 项目名称   | 多学科交叉融合视域下“OBE+ADDIE”模式在本科护生外科护理见习教学中的应用研究                                                                     |
| 主要研究者  | 戴月, 邱志敏                                                                                                        |
| 研究机构   | 江西省肿瘤医院                                                                                                        |
| 伦理审查意见 | <p>经审查, 该研究符合科学和伦理原则, 受试者风险在可控范围, 且不存在利益冲突, 同意开展,</p> <p>主任委<br/>江西省肿瘤医院医学伦理委员会<br/>(盖章)<br/>日期: 2024年3月1日</p> |

- 备注: 1、该文件有效期为1年, 请在有效期到期前一个月内向本医学伦理委员会(简称本会)提出申请。
- 2、本会对同意项目具体要求如下: ① 研究过程中如需修改研究方案、知情同意书、招募材料或变更主要研究者等, 应在修改前提交修正案申请, 在未获得本会同意/肯定答复前不得实施方案的任何偏离和修改。②如果研究过程中发生任何严重不良事件及影响研究风险受益比的非预期事件, 请及时向本会报告。③根据本会对跟踪审查的意见, 无论项目开始与否, 请在跟踪审查日到期前一个月提出跟踪审查的申请, 本会有权根据实际进展情况改变跟踪审查频率。④申办者/主要研究者暂停/终止研究, 请及时通知本会。⑤如果试验过程中发现不依从/违反试验方案情况请及时报告本会⑥项目完成, 可提交结题报告。
- 3、该文件所示科研项目应当在批准之日1年内实施。逾期未实施的, 本批件自行废止。
- 4、如项目涉及人体生物样本外送至境外实验室检测, 待获得“中国人类遗传资源管理办公室”批准后将批件递交医学伦理委员会备案才可开展相关工作,
- 5、本会地址: 江西省南昌市北京东路519号, 邮编: 330029, 联系电话: 0791-88350137,
- 6、跟踪审查频率: 3月 6月 1年 其它\_\_\_\_ 不适用
