# Supplementary material
Source: Research Square preprint supplement (doi:10.21203/rs.3.rs-8967090/v1)
Supplement: Supplementary file 2 [file 7bb0353676a79fb090aee06c.doc]

Dear fellow students,

Hello, thank you very much for taking the time to participate in this survey despite your demanding academic workload!The purpose of this study is to investigate the self-directed learning abilities and critical thinking skills of undergraduate nursing students. It aims to provide reference suggestions for nursing educators in formulating teaching reform strategies, thereby enhancing the quality of clinical nursing education.This questionnaire is anonymous and the survey materials are for research purposes only. Please read carefully and complete the following questions independently based on your actual circumstances. Double-check the questionnaire for any missing or omitted items. We sincerely appreciate your support and cooperation. Wishing you academic success and a joyful life! Each questionnaire should take 20-30 minutes to complete.

Filling Instructions: Please check the corresponding box with a “√” or fill in the details on the blank line.

**Part Ⅰ：eneral Information Questionnaire**

1.Gender： ① Male ② Female

2. Age: ________ years old

3. Family origin: ① Urban ② Rural

4. Is Nursing your first choice major?

① Yes ② No

5. Students' Attitudes Toward Nursing:

① Like ② Neutral ③ Dislike

6.Whether the student will pursue a nursing career after graduation: ① Yes ② No

**Part II: Self-Directed Learning Ability Assessment Scale**

| **Items** | **Options** | | | | |
| --- | --- | --- | --- | --- | --- |
| **Strongly disagree** | **Somewhat disagree** | **Neutral** | **Somewhat agree** | **Strongly**  **agree** |
| 1.I place greater emphasis on mastering professional knowledge and skills, rather than merely preparing for exams. | 1 | 2 | 3 | 4 | 5 |
| 2. When I finish reading a book or an article, I can always grasp its main points. | 1 | 2 | 3 | 4 | 5 |
| 3. When others perform better academically than me, I feel pressured and strive to surpass them. | 1 | 2 | 3 | 4 | 5 |
| 4. I regularly review nursing journals I am familiar with. | 5 | 4 | 3 | 2 | 1 |
| 5. I believe that through diligent effort, I will achieve outstanding results. | 5 | 4 | 3 | 2 | 1 |
| 6. I am sensitive to new sources of information. | 5 | 4 | 3 | 2 | 1 |
| 7. I find learning to be an enjoyable activity. | 5 | 4 | 3 | 2 | 1 |
| 8. When I encounter difficulties in my studies, I proactively seek guidance from my teachers or others. | 5 | 4 | 3 | 2 | 1 |
| 9. When I study, I always like to make a study plan first. | 5 | 4 | 3 | 2 | 1 |
| 10. During our group discussions, I tend to be reluctant to voice my opinions. | 5 | 4 | 3 | 2 | 1 |
| 11. I review the material I learn each day, and I always like to make a study plan first. | 5 | 4 | 3 | 2 | 1 |
| 12. After completing my studies, I clearly know whether I have achieved my predetermined learning objectives.。 | 5 | 4 | 3 | 2 | 1 |
| 13. Even when my academic tasks are the most challenging, I will persevere. | 5 | 4 | 3 | 2 | 1 |
| 14. I can choose suitable study environments or take appropriate measures to eliminate distractions from all sources. | 5 | 4 | 3 | 2 | 1 |
| 15. In my learning process, I pay close attention to the teacher's words and actions. | 5 | 4 | 3 | 2 | 1 |
| 16. To be honest, I often feel overwhelmed by anxiety during my studies. | 5 | 4 | 3 | 2 | 1 |
| 17. I can independently seek solutions when encountering problems and do not give up easily when facing difficulties. | 5 | 4 | 3 | 2 | 1 |
| 18. I can choose learning methods that suit me based on different learning content. | 5 | 4 | 3 | 2 | 1 |
| 19. If I don't understand a particular concept, I go back and relearn it until I grasp it. | 5 | 4 | 3 | 2 | 1 |
| 20. I don't want to discuss my academic achievements and challenges with my classmates. | 5 | 4 | 3 | 2 | 1 |
| 21. I typically allocate time based on the workload of different subjects. | 5 | 4 | 3 | 2 | 1 |
| 22. I am eager to exchange learning experiences with students from other disciplines to enrich my knowledge base. | 5 | 4 | 3 | 2 | 1 |
| 23. I possess a strong thirst for knowledge. I constantly ask numerous questions related to learning and strive to find answers.。 | 5 | 4 | 3 | 2 | 1 |
| 24. When I ask others for help with my studies, I take all their advice to heart. | 5 | 4 | 3 | 2 | 1 |
| 25. I believe I have the ability to solve problems in my studies. | 5 | 4 | 3 | 2 | 1 |
| 26. In my free time, I like to study things that interest me. | 5 | 4 | 3 | 2 | 1 |
| 27. I believe the knowledge and skills I am currently acquiring will be of great significance to my future career. | 5 | 4 | 3 | 2 | 1 |
| 28. I rarely search for reference materials online for study purposes. | 5 | 4 | 3 | 2 | 1 |
| 29. Whether I can secure a scholarship serves as a powerful motivator for my studies. | 5 | 4 | 3 | 2 | 1 |
| 30. When needed, I will compile the relevant information I have gathered into reports, summaries, or related learning materials. | 5 | 4 | 3 | 2 | 1 |

**Part III Critical Thinking Ability Measurement Scale (CTDI-CV)**

| **Items** | **Options** | | | | | |
| --- | --- | --- | --- | --- | --- | --- |
| **Strongly**  **agree** | **Agree** | **Somewhat Agree** | **Neutral** | **Somewhat disagree** | **Strongly disagree** |
| **一、truth seeking** | | | | | | |
| 1. When confronted with a controversial topic, it is not easy for me to choose one perspective from among differing viewpoints. | 1 | 2 | 3 | 4 | 5 | 6 |
| 2. When I have multiple reasons to agree with something and only one reason to disagree, I will choose to agree with it. | 1 | 2 | 3 | 4 | 5 | 6 |
| 3. Even when evidence contradicts my beliefs, I will stick to my convictions. | 1 | 2 | 3 | 4 | 5 | 6 |
| 4.When I deal with complex problems, I feel overwhelmed. | 1 | 2 | 3 | 4 | 5 | 6 |
| 5.When I express my opinion, it is impossible to remain objective. | 1 | 2 | 3 | 4 | 5 | 6 |
| 6. I only seek facts that support my views, not those that contradict them. | 1 | 2 | 3 | 4 | 5 | 6 |
| 7. There are many issues where I'm afraid to seek the truth. | 1 | 2 | 3 | 4 | 5 | 6 |
| 8. Since I know how to make this decision, I won't keep mulling over other options. | 1 | 2 | 3 | 4 | 5 | 6 |
| 9. We don't know what criteria to use to measure the vast majority of issues. | 1 | 2 | 3 | 4 | 5 | 6 |
| 10. Personal experience is the sole criterion for verifying truth. | 1 | 2 | 3 | 4 | 5 | 6 |
| **二、开放思想（open mindedness）** | | | | | | |
| 11. Understanding how others perceive things is important to me. | 1 | 2 | 3 | 4 | 5 | 6 |
| 12. I'm trying to make fewer subjective judgments. | 1 | 2 | 3 | 4 | 5 | 6 |
| 13. Studying the thoughts of foreigners is quite meaningful. | 1 | 2 | 3 | 4 | 5 | 6 |
| 14. When I face difficulties, I must consider all possibilities of the situation, which is impossible for me to do. | 1 | 2 | 3 | 4 | 5 | 6 |
| 15. During group discussions, if someone's viewpoint is deemed incorrect by others, they lose the right to express their opinion. | 1 | 2 | 3 | 4 | 5 | 6 |
| 16. Foreigners should learn our culture, not expect us to understand theirs. | 1 | 2 | 3 | 4 | 5 | 6 |
| 17. I should not be forced to defend my opinions. | 1 | 2 | 3 | 4 | 5 | 6 |
| 18. Maintaining an open attitude toward different worldviews (e.g., evolutionism, theism) is not particularly important. | 1 | 2 | 3 | 4 | 5 | 6 |
| 19. Everyone has the right to express their opinions, but I won't pay them any mind. | 1 | 2 | 3 | 4 | 5 | 6 |
| 20. I won't question things that everyone takes for granted. | 1 | 2 | 3 | 4 | 5 | 6 |
| **三、分析能力（analyticity）** | | | | | | |
| 21. When others defend a good idea with shallow arguments, I feel anxious. | 1 | 2 | 3 | 4 | 5 | 6 |
| 22. All my beliefs must be supported by evidence. | 1 | 2 | 3 | 4 | 5 | 6 |
| 23. To oppose someone else's opinion, you must present your reasons. | 1 | 2 | 3 | 4 | 5 | 6 |
| 24. I find myself frequently evaluating others' arguments. | 1 | 2 | 3 | 4 | 5 | 6 |
| 25. I can be considered someone who approaches problems with logical analysis. | 1 | 2 | 3 | 4 | 5 | 6 |
| 26. When tackling difficult problems, the first step is to pinpoint the root cause of the issue. | 1 | 2 | 3 | 4 | 5 | 6 |
| 27. I am adept at tackling problems in an organized manner. | 1 | 2 | 3 | 4 | 5 | 6 |
| 28. I'm not a very logical person, but I often pretend to be.。 | 1 | 2 | 3 | 4 | 5 | 6 |
| 29. It is impossible to determine which is the better solution. | 1 | 2 | 3 | 4 | 5 | 6 |
| 30. Life experience has taught me that you don't have to be overly logical in handling matters. | 1 | 2 | 3 | 4 | 5 | 6 |
| **四、系统化能力（systematicity）** | | | | | | |
| 31. I always analyze the crux of the problem first before tackling it. | 1 | 2 | 3 | 4 | 5 | 6 |
| 32. I find it easy to organize my thoughts. | 1 | 2 | 3 | 4 | 5 | 6 |
| 33. I excel at devising systematic plans to tackle complex problems. | 1 | 2 | 3 | 4 | 5 | 6 |
| 34. I often reflect on the successes and failures in my practice and experience. | 1 | 2 | 3 | 4 | 5 | 6 |
| 35. My attention is easily distracted by external influences. | 1 | 2 | 3 | 4 | 5 | 6 |
| 36. I can keep talking about a certain issue, but I don't care whether it gets resolved or not. | 1 | 2 | 3 | 4 | 5 | 6 |
| 37. When I see that the instructions for a new product are complicated and hard to understand, I give up on reading them. | 1 | 2 | 3 | 4 | 5 | 6 |
| 38. People say I make decisions too impulsively. | 1 | 2 | 3 | 4 | 5 | 6 |
| 39. People think I'm indecisive when making decisions. | 1 | 2 | 3 | 4 | 5 | 6 |
| 40. My views on controversial topics tend to align with the last person I discuss them with. | 1 | 2 | 3 | 4 | 5 | 6 |
| **五、评判性思维的自信心（self-confidendce）** | | | | | | |
| 41. I appreciate my ability to think with precision. | 1 | 2 | 3 | 4 | 5 | 6 |
| 42. Tests that require thinking rather than relying solely on memory suit me better. | 1 | 2 | 3 | 4 | 5 | 6 |
| 43. My curiosity and thirst for knowledge are appreciated by others. | 1 | 2 | 3 | 4 | 5 | 6 |
| 44. When faced with problems, my peers turn to me for decisions because I can provide objective analysis. | 1 | 2 | 3 | 4 | 5 | 6 |
| 45. I'm satisfied that I can come up with creative options. | 1 | 2 | 3 | 4 | 5 | 6 |
| 46. When making decisions, others expect me to establish appropriate guidelines for guidance. | 1 | 2 | 3 | 4 | 5 | 6 |
| 47. I have a strong thirst for knowledge. | 1 | 2 | 3 | 4 | 5 | 6 |
| 48. I am satisfied that I can understand other people's perspectives. | 1 | 2 | 3 | 4 | 5 | 6 |
| 49. When things get tough, others expect me to keep handling them. | 1 | 2 | 3 | 4 | 5 | 6 |
| 50. I often feel afraid when I express opinions that differ from others. | 1 | 2 | 3 | 4 | 5 | 6 |
| **六、求知欲（inquisitiveness）** | | | | | | |
| 51. Exploring new things enriches my life. | 1 | 2 | 3 | 4 | 5 | 6 |
| 52. Before making an important decision, I will first gather all relevant information. | 1 | 2 | 3 | 4 | 5 | 6 |
| 53. I look forward to tackling challenging endeavors. | 1 | 2 | 3 | 4 | 5 | 6 |
| 54. Solving problems is an enjoyable endeavor. | 1 | 2 | 3 | 4 | 5 | 6 |
| 55. I enjoy figuring out how things work. | 1 | 2 | 3 | 4 | 5 | 6 |
| 56. No matter what the topic, I'm always eager to learn more about it. | 1 | 2 | 3 | 4 | 5 | 6 |
| 57. I will strive to learn everything I can, even if I don't know when it will be useful. | 1 | 2 | 3 | 4 | 5 | 6 |
| 58. Most courses at school are dull and uninspiring, not worth taking. | 1 | 2 | 3 | 4 | 5 | 6 |
| 59. Required courses in school are a waste of time. | 1 | 2 | 3 | 4 | 5 | 6 |
| 60. Taking the initiative to tackle all sorts of challenges isn't that important.。 | 1 | 2 | 3 | 4 | 5 | 6 |
| **七、认知成熟度（maturity）** | | | | | | |
| 61. The best arguments often stem from a sudden insight into a problem. | 1 | 2 | 3 | 4 | 5 | 6 |
| 62. The so-called truth is nothing more than a personal perspective. | 1 | 2 | 3 | 4 | 5 | 6 |
| 63. Paying a high price (e.g., money, time, effort) will inevitably yield better advice. | 1 | 2 | 3 | 4 | 5 | 6 |
| 64. When I maintain an open attitude, I cannot tell what is true and what is false. | 1 | 2 | 3 | 4 | 5 | 6 |
| 65. If possible, I would try to avoid reading. | 1 | 2 | 3 | 4 | 5 | 6 |
| 66. I hold unwavering faith in what I believe. | 1 | 2 | 3 | 4 | 5 | 6 |
| 67. Understanding problems through metaphor is like piloting a small boat on a highway. | 1 | 2 | 3 | 4 | 5 | 6 |
| 68. The best way to solve a difficult problem is to ask others for the answer. | 1 | 2 | 3 | 4 | 5 | 6 |
| 69. The essence of a thing is consistent with its appearance. | 1 | 2 | 3 | 4 | 5 | 6 |
| 70. The decisions made by those in power are the right decisions. | 1 | 2 | 3 | 4 | 5 | 6 |
